# Supplementary material for: Controlled synthesis of α-Fe2O3nanostructures with the assistance of ionic liquid and their distinct photocatalytic performance under visible-light irradiation
Source: Royal Society of Chemistry journal article supplement (doi:10.1039/c4ce02033b), 2014-12-09
Supplement: c4ce02033b1.pdf [file c4ce02033b1.pdf]

Electronic Supplementary Information for

**Controlled Synthesis of  $\alpha$ -Fe<sub>2</sub>O<sub>3</sub> Nanostructures by Ionic Liquid and  
Their Distinct Photocatalytic Performances under Visible-light  
Irradiation**

*Shuting Xie<sup>a</sup>, Han Jia<sup>b</sup>, Fei Lu<sup>a</sup>, Nan Sun<sup>a</sup>, Jierui Yu<sup>a</sup>, Shaojie Liu<sup>c\*</sup>, Liqiang  
Zheng<sup>a,c\*</sup>*

*<sup>a</sup>Key laboratory of Colloid and Interface Chemistry, Shandong University, Ministry of  
Education, Jinan, 250100, China*

*<sup>b</sup>College of Petroleum Engineering, China University of Petroleum (Huadong),  
Qingdao, 266580, China*

*<sup>c</sup>National Engineer Technology Research Center for Colloidal Materials, Shandong  
University, Jinan, 250100, China*

---

*Phone number: +86-531-88366062*

*Fax number: +86-531-88564750*

*E-mail address: [lqzheng@sdu.edu.cn](mailto:lqzheng@sdu.edu.cn)*

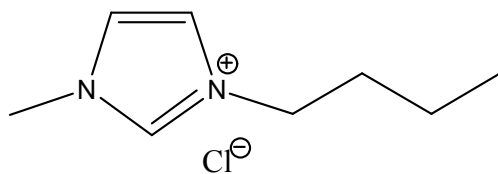

1-butyl-3-methylimidazolium chloride

a: [Bmim]Cl

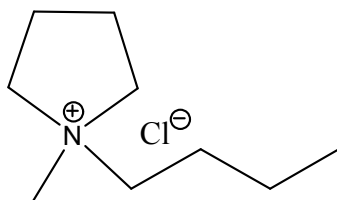

1-butyl-1-methylpyrrolidinium chloride

b: [Bmpyr]Cl

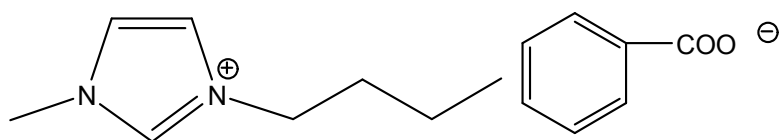

1-butyl-3-methylimidazolium benzoate

c: [Bmim][PhCOO]

**Fig. S1.** Molecular structures of the three ionic liquids. (a) [Bmim]Cl, (b) [Bmpyr]Cl, (c) [Bmim][PhCOO].

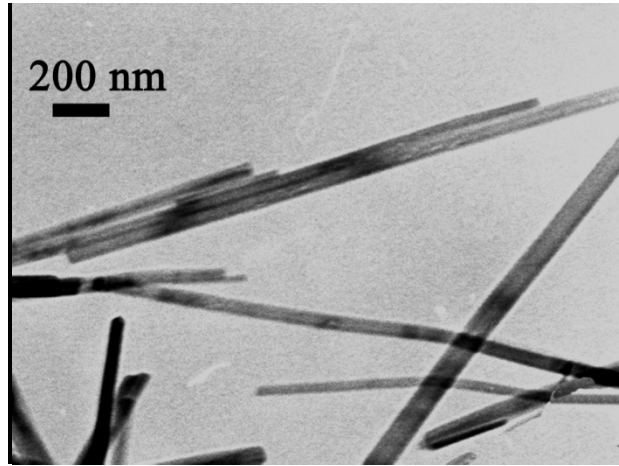

**Fig. S2.** TEM image of  $\alpha$ -Fe<sub>2</sub>O<sub>3</sub> rod II.

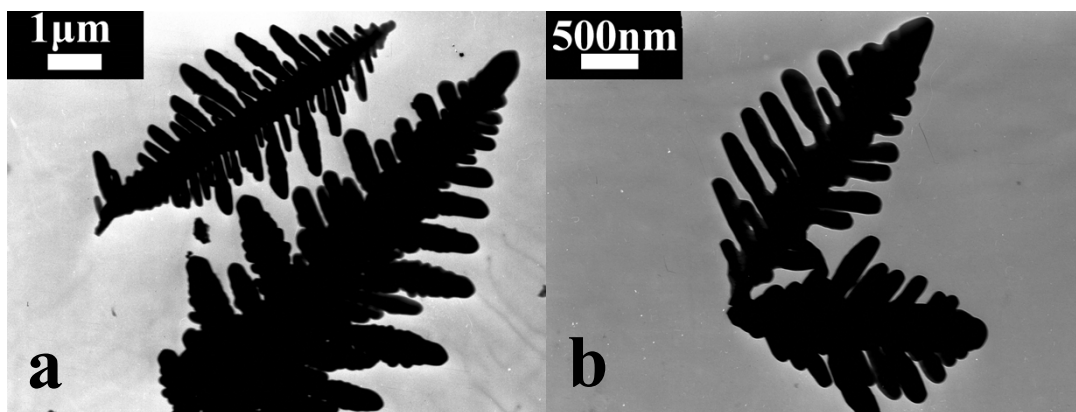

**Fig. S3.** TEM images of obtained  $\alpha$ - $\text{Fe}_2\text{O}_3$  nanocrystals from PhCOONa with different molar ratios of PhCOONa to  $\text{K}_3\text{Fe}(\text{CN})_6$ . (a) 2:1, (b) 5:1.

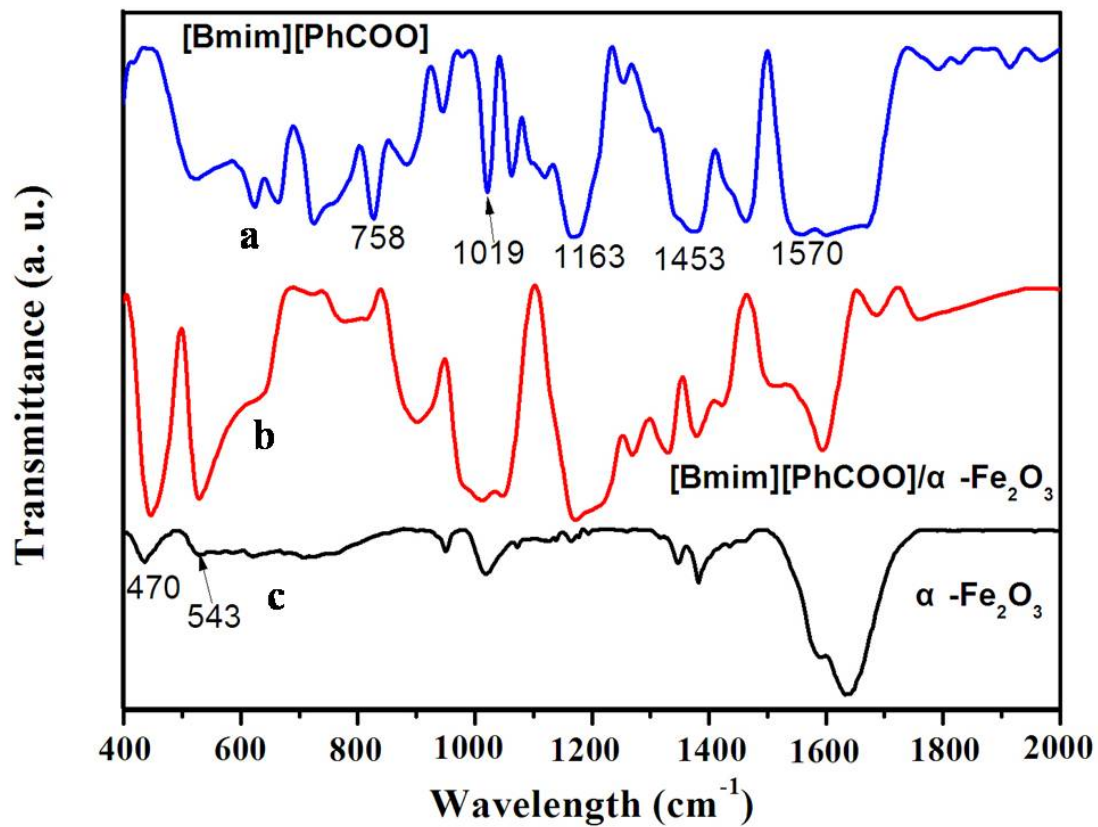

Fig. S4. FT-IR spectra of (a) pure [Bmim][PhCOO], (b) [Bmim][PhCOO]/ $\alpha$ -Fe<sub>2</sub>O<sub>3</sub>, (c)  $\alpha$ -Fe<sub>2</sub>O<sub>3</sub>.

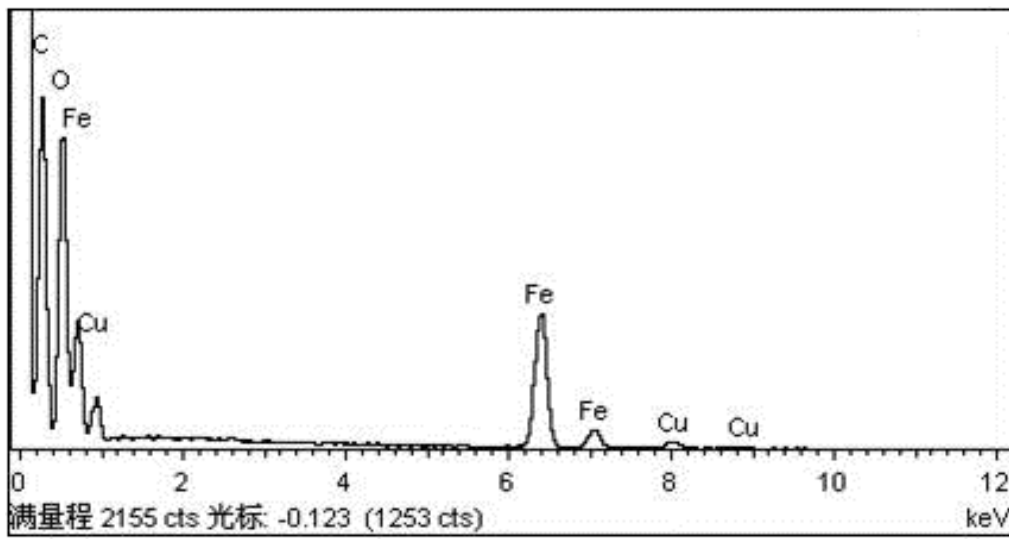

Fig. S5. EDS spectra of the obtained  $\alpha$ -Fe<sub>2</sub>O<sub>3</sub> after washing several times with distilled water and anhydrous alcohol.

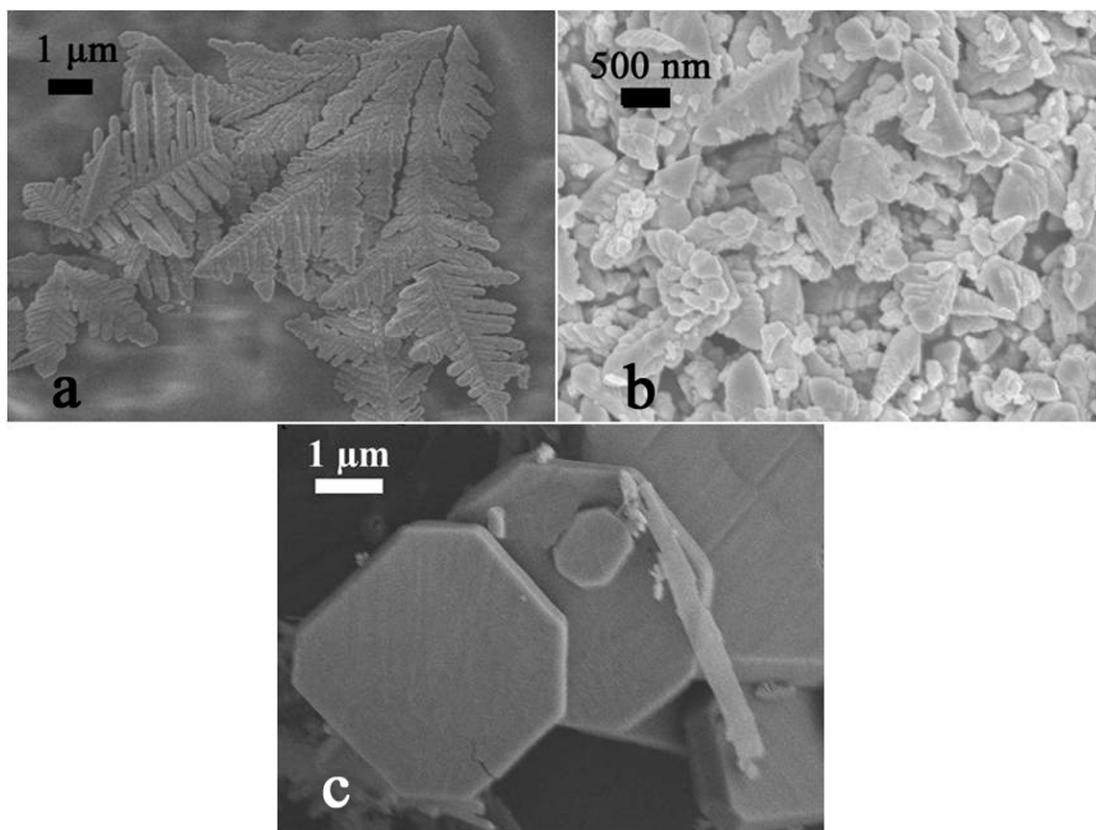

Figure S6. SEM images of the  $\alpha$ - $\text{Fe}_2\text{O}_3$  crystals obtained in lower ratios  $r$ . (a)  $r = 0.2:1$ , (b)  $r = 0.5:1$ , (c)  $r = 1:1$ .

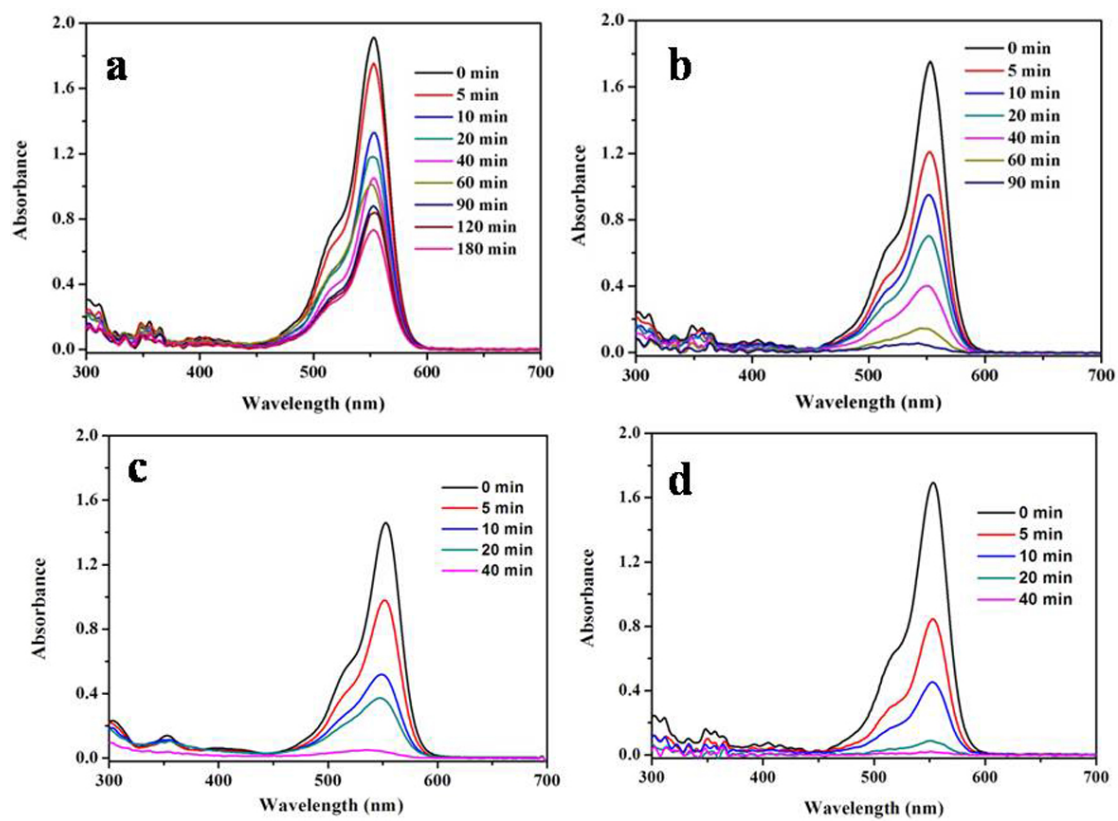

**Fig. S7.** UV-vis spectral changes of RhB aqueous solutions as a function of time in the presence of  $\alpha$ -Fe<sub>2</sub>O<sub>3</sub> nanocrystals and H<sub>2</sub>O<sub>2</sub> additive. (a) dendrite, (b) plate, (c) rod I, (d) rod II.



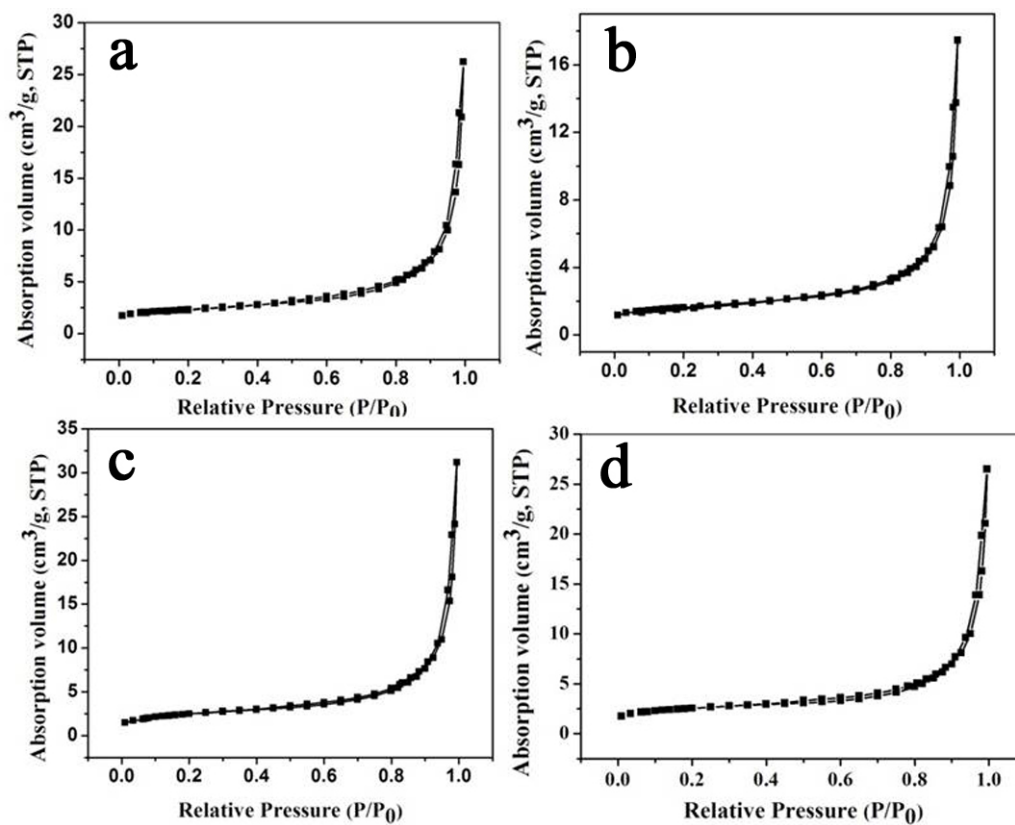

**Fig. S8.** Nitrogen adsorption-desorption isothermal for different  $\alpha$ -Fe<sub>2</sub>O<sub>3</sub> nanocrystals. (a) dendrite, (b) plate, (c) rod I, (d) rod II.
